# Supplementary material for: Self-harm behaviour and externally-directed aggression in psychiatric outpatients: a multicentre, prospective study (viormed-2 study)
Source: PubMed Central journal article supplement (PMC6882905; doi:10.1038/s41598-019-53993-7), 2019-11-28
Supplement: 41598_2019_53993_MOESM1_ESM.pdf [file 41598_2019_53993_MOESM1_ESM.pdf]

Paolo Scocco<sup>1</sup>, Ambra Macis<sup>2</sup>, Clarissa Ferrari<sup>2</sup>, Mattia Bava<sup>3</sup>, Giorgio Bianconi<sup>4</sup>, Viola Bulgari<sup>5</sup>, Valentina Candini<sup>5</sup>, Giuseppe Carrà<sup>3,6</sup>, Cesare Cavallera<sup>5,7</sup>, Massimo Clerici<sup>3,8</sup>, Giovanni Conte<sup>9</sup>, Marta Cricelli<sup>10</sup>, Maria Teresa Ferla<sup>10</sup>, Laura Iozzino<sup>5</sup>, Alberto Stefana<sup>9</sup>,  
Giovanni de Girolamo<sup>5</sup>

**SELF-HARM BEHAVIOUR AND EXTERNALLY-DIRECTED  
AGGRESSION IN PSYCHIATRIC OUTPATIENTS: A MULTICENTRE,  
PROSPECTIVE STUDY (VIORMED-2 STUDY)**

**SUPPLEMENTARY FILES**

**Table 1S**  
**Socio-demographic characteristics of the sample**

|                                        | <b>V</b><br>N=73<br>n (%) | <b>V-SH</b><br>N=53<br>n (%) | <b>SH</b><br>N=34<br>n (%) | <b>CONT</b><br>N=86<br>n (%) | <i>p-value</i>   |
|----------------------------------------|---------------------------|------------------------------|----------------------------|------------------------------|------------------|
| <b>Age Mean (SD)</b>                   | 45.4 (10.2)               | 44.2 (9.8)                   | 46.5 (12.0)                | 43.8 (10.9)                  | 0.552            |
| <b>Sex</b>                             |                           |                              |                            |                              |                  |
| Male                                   | 63 (86.3)                 | 40 (75.5)                    | 20 (58.8)                  | 69 (80.2)                    | <b>0.014</b>     |
| Female                                 | 10 (13.7)                 | 13 (24.5)                    | 14 (41.2)                  | 17 (19.8)                    |                  |
| <b>Nationality</b>                     |                           |                              |                            |                              |                  |
| Italian                                | 71 (97.3)                 | 50 (94.3)                    | 33 (97.1)                  | 85 (98.8)                    | 0.439 #          |
| Other                                  | 2 (2.7)                   | 3 (5.7)                      | 1 (2.9)                    | 1 (1.2)                      |                  |
| <b>Marital status</b>                  |                           |                              |                            |                              |                  |
| Married or cohabitant                  | 27 (37.0)                 | 24 (45.3)                    | 17 (50.0)                  | 30 (34.9)                    | 0.355            |
| Single                                 | 46 (63.0)                 | 29 (54.7)                    | 17 (50.0)                  | 56 (65.1)                    |                  |
| <b>Education</b>                       |                           |                              |                            |                              |                  |
| Low level                              | 48 (65.8)                 | 34 (64.2)                    | 15 (44.1)                  | 48 (55.8)                    | 0.143            |
| Medium-high level                      | 25 (34.2)                 | 19 (35.8)                    | 19 (55.9)                  | 38 (44.2)                    |                  |
| <b>Occupation</b>                      |                           |                              |                            |                              |                  |
| Employed                               | 29 (39.7)                 | 23 (44.2)                    | 12 (36.4)                  | 48 (56.5)                    | 0.102            |
| Unemployed                             | 44 (60.3)                 | 29 (55.8)                    | 21 (63.6)                  | 37 (43.5)                    |                  |
| <b>Social support in the last year</b> |                           |                              |                            |                              |                  |
| Present                                | 61 (85.9)                 | 41 (80.4)                    | 26 (78.8)                  | 72 (84.7)                    | 0.738            |
| Absent                                 | 10 (14.1)                 | 10 (19.6)                    | 7 (21.2)                   | 13 (15.3)                    |                  |
| <b>Time spent doing nothing</b>        |                           |                              |                            |                              |                  |
| Less than 3 h/day                      | 28 (38.9)                 | 18 (35.3)                    | 16 (48.5)                  | 49 (57.6)                    | <b>0.036</b>     |
| More than 3 h/day                      | 44 (61.1)                 | 33 (64.7)                    | 17 (51.5)                  | 36 (42.4)                    |                  |
| <b>Episodes of violence in family</b>  |                           |                              |                            |                              |                  |
| Yes                                    | 13 (19.4)                 | 27 (54.0)                    | 7 (21.2)                   | 4 (4.9)                      | <b>&lt;0.001</b> |
| No                                     | 54 (80.6)                 | 23 (46.0)                    | 26 (78.7)                  | 77 (95.1)                    |                  |

V: patients with a history of violent behaviour against other people (but not self-harm behaviour); V-SH: patients with both a history of violent behaviour against other people and self-harm behaviour; SH: patients with a history of self-harm behaviour; CONT: patients with no history of violent behaviour against other people and of self-harm behaviour.

For continuous variables Mean (SD) is reported and corresponding p-value was evaluated through ANOVA and Kruskal-Wallis test. For categorical variables frequency (%) is reported and corresponding p-value was obtained through  $\chi^2$  test or Fisher's exact test (when  $n < 5$  at least in one cell).

**Table 2S**  
**Clinical rating scale scores at baseline by groups**

|                                       | <b>V (1)</b><br>N=73<br>M(SD) | <b>V-SH (2)</b><br>N=53<br>M(SD) | <b>SH (3)</b><br>N=34<br>M(SD) | <b>CONT (4)</b><br>N=86<br>M(SD) | <i>p-value</i>   | Post-hoc                                                                                                                                        |                  |
|---------------------------------------|-------------------------------|----------------------------------|--------------------------------|----------------------------------|------------------|-------------------------------------------------------------------------------------------------------------------------------------------------|------------------|
| <b>BGLHA</b>                          |                               |                                  |                                |                                  |                  |                                                                                                                                                 |                  |
| Total score                           | 36.8 (10.4)                   | 44.8 (13.5)                      | 37.8 (11.0)                    | 32.2 (8.8)                       | <b>&lt;0.001</b> | (2) vs (4) <0.001                                                                                                                               |                  |
| <b>BPRS</b>                           |                               |                                  |                                |                                  |                  |                                                                                                                                                 |                  |
| Affect-Anxiety                        | 10.7 (4.0)                    | 12.2 (4.2)                       | 11.1 (4.2)                     | 10.9 (4.4)                       | 0.136            | <b>(1) vs (4) 0.002</b><br><b>(2) vs (4) 0.038</b>                                                                                              |                  |
| Activation                            | 12.2 (5.2)                    | 11.8 (5.2)                       | 9.9 (3.1)                      | 9.5 (3.0)                        | <b>0.001</b>     |                                                                                                                                                 |                  |
| Negative Symptoms                     | 5.7 (3.3)                     | 4.9 (2.4)                        | 5.5 (2.8)                      | 4.8 (3.0)                        | 0.696            | <b>(1) vs (2) &lt;0.1</b>                                                                                                                       |                  |
| Psychotic Symptoms                    | 12.8 (5.9)                    | 11.1 (4.1)                       | 10.8 (2.7)                     | 11.1 (3.8)                       | 0.207            |                                                                                                                                                 |                  |
| Depression (item 3)                   | 1.7 (1.0)                     | 2.2 (1.2)                        | 2.0 (1.2)                      | 1.7 (1.0)                        | <b>0.040</b>     |                                                                                                                                                 |                  |
| Total Score                           | 41.3 (12.3)                   | 40.6 (11.0)                      | 37.3 (8.6)                     | 36.7 (9.1)                       | 0.115            |                                                                                                                                                 |                  |
| <b>SLOF</b>                           |                               |                                  |                                |                                  |                  |                                                                                                                                                 |                  |
| Physical functioning                  | 24.1 (1.4)                    | 24.2 (1.5)                       | 24.3 (0.9)                     | 24.2 (1.5)                       | 0.896            | <b>(1) vs (2) 0.009</b><br><b>(1) vs (3) 0.009</b><br><b>(1) vs (4) &lt;0.001</b><br><b>(2) vs (3) &lt;0.001</b><br><b>(2) vs (4) &lt;0.001</b> |                  |
| Self-care                             | 33.3 (2.9)                    | 33.2 (2.9)                       | 33.7 (2.8)                     | 33.3 (3.2)                       | 0.883            |                                                                                                                                                 |                  |
| Interpersonal relationships           | 23.4 (6.0)                    | 24.6 (5.9)                       | 26.1 (6.1)                     | 24.4 (5.4)                       | 0.173            |                                                                                                                                                 |                  |
| Social acceptability/adjustment       | 24.5 (3.4)                    | 22.5 (4.6)                       | 26.8 (2.9)                     | 27.1 (2.6)                       | <b>&lt;0.001</b> |                                                                                                                                                 |                  |
| Activities                            | 48.0 (7.7)                    | 49.3 (6.9)                       | 50.4 (5.1)                     | 49.6 (6.4)                       | 0.292            |                                                                                                                                                 |                  |
| Work skills                           | 21.4 (6.8)                    | 21.7 (6.4)                       | 22.7 (6.5)                     | 23.5 (5.9)                       | 0.171            |                                                                                                                                                 |                  |
| <b>BDHI</b>                           |                               |                                  |                                |                                  |                  |                                                                                                                                                 |                  |
| Assault                               | 4.0 (2.6)                     | 5.4 (2.5)                        | 4.0 (2.3)                      | 4.6 (2.5)                        | <b>0.046</b>     |                                                                                                                                                 | (1) vs (2) 0.058 |
| Indirect aggression                   | 4.0 (2.2)                     | 5.5 (2.1)                        | 5.4 (1.3)                      | 4.2 (1.8)                        | <b>&lt;0.001</b> | <b>(1) vs (2) &lt;0.001</b><br><b>(1) vs (3) 0.008</b><br><b>(2) vs (4) 0.008</b><br><b>(3) vs (4) 0.034</b>                                    |                  |
| Verbal aggression                     | 6.0 (2.7)                     | 7.3 (2.9)                        | 6.5 (2.6)                      | 6.2 (2.5)                        | 0.099            |                                                                                                                                                 |                  |
| Irritability                          | 3.8 (2.6)                     | 4.6 (2.6)                        | 4.6 (2.5)                      | 3.8 (2.2)                        | 0.149            |                                                                                                                                                 |                  |
| Negativism                            | 2.3 (1.5)                     | 3.0 (1.6)                        | 2.2 (1.6)                      | 2.4 (1.6)                        | 0.096            |                                                                                                                                                 |                  |
| Resentment                            | 3.7 (1.9)                     | 4.2 (2.1)                        | 4.7 (2.2)                      | 3.6 (2.3)                        | 0.143            |                                                                                                                                                 |                  |
| Suspicion                             | 4.0 (2.6)                     | 4.3 (2.1)                        | 4.8 (2.7)                      | 4.1 (2.6)                        | 0.560            |                                                                                                                                                 |                  |
| Guilt                                 | 4.9 (2.3)                     | 4.9 (2.4)                        | 5.3 (2.3)                      | 4.0 (2.2)                        | 0.055            |                                                                                                                                                 |                  |
| Total score                           | 33.0 (14.7)                   | 38.8 (14.0)                      | 36.9 (12.5)                    | 34.1 (12.4)                      | 0.263            |                                                                                                                                                 |                  |
| <b>BIS</b>                            |                               |                                  |                                |                                  |                  |                                                                                                                                                 |                  |
| Attentional impulsiveness             | 15.0 (3.9)                    | 16.0 (4.8)                       | 15.3 (4.1)                     | 14.2 (3.7)                       | 0.118            | <b>(2) vs (4) &lt;0.1</b>                                                                                                                       |                  |
| Motor impulsiveness                   | 22.4 (4.9)                    | 23.0 (4.8)                       | 22.9 (5.4)                     | 20.8 (4.1)                       | <b>0.028</b>     |                                                                                                                                                 |                  |
| Non-planning impulsiveness            | 27.4 (5.0)                    | 27.0 (5.9)                       | 27.6 (6.2)                     | 25.9 (5.0)                       | 0.278            |                                                                                                                                                 |                  |
| Total score                           | 64.5 (10.9)                   | 65.3 (12.6)                      | 65.8 (11.9)                    | 60.6 (9.4)                       | <b>0.035</b>     |                                                                                                                                                 | -----            |
| <b>STAXI-2</b>                        |                               |                                  |                                |                                  |                  |                                                                                                                                                 |                  |
| State anger                           | 33.3 (17.2)                   | 33.7 (24.1)                      | 29.8 (17.6)                    | 32.3 (17.8)                      | 0.713            | <b>(2) vs (4) &lt;0.001</b>                                                                                                                     |                  |
| Feeling angry                         | 25.3 (21.3)                   | 23.3 (27.1)                      | 21.9 (20.8)                    | 27.4 (24.3)                      | 0.587            |                                                                                                                                                 |                  |
| Feel like expressing anger verbally   | 25.7 (22.8)                   | 22.9 (26.8)                      | 21.5 (21.9)                    | 25.8 (21.9)                      | 0.546            |                                                                                                                                                 |                  |
| Feel like expressing anger physically | 24.5 (22.3)                   | 21.6 (25.2)                      | 22.1 (23.9)                    | 24.6 (21.8)                      | 0.754            |                                                                                                                                                 |                  |
| Trait anger                           | 33.1 (19.9)                   | 32.8 (18.9)                      | 29.5 (16.4)                    | 29.1 (15.9)                      | 0.683            |                                                                                                                                                 |                  |
| Angry temperament                     | 27.6 (24.6)                   | 22.3 (22.5)                      | 22.9 (22.1)                    | 24.5 (20.9)                      | 0.594            |                                                                                                                                                 |                  |
| Angry reaction                        | 26.7 (23.5)                   | 23.5 (23.3)                      | 22.0 (19.6)                    | 23.8 (19.1)                      | 0.941            |                                                                                                                                                 |                  |
| Anger expression-out                  | 30.5 (21.1)                   | 29.5 (21.0)                      | 25.3 (16.3)                    | 26.7 (16.5)                      | 0.390            |                                                                                                                                                 |                  |
| Anger expression-in                   | 32.0 (20.7)                   | 29.4 (19.0)                      | 31.0 (19.4)                    | 32.3 (19.1)                      | 0.990            |                                                                                                                                                 |                  |
| Anger control-out                     | 29.5 (13.3)                   | 25.6 (13.9)                      | 28.4 (15.1)                    | 35.1 (15.2)                      | <b>0.001</b>     |                                                                                                                                                 |                  |

|                        |             |             |             |             |              |                  |
|------------------------|-------------|-------------|-------------|-------------|--------------|------------------|
| Anger control-in       | 32.1 (15.2) | 29.8 (16.0) | 33.1 (17.5) | 36.1 (16.3) | 0.070        |                  |
| Anger expression Index | 45.5 (16.6) | 47.8 (17.3) | 42.8 (15.7) | 38.8 (14.9) | <b>0.020</b> | (2) vs (4) 0.027 |

V: patients with a history of violent behaviour against other people (but not self-harm behaviour); V-SH: patients with both a history of violent behaviour against other people and self-harm behaviour; SH: patients with a history of self-harm behaviour; CONT: patients with no history of violent behaviour against other people and of self-harm behaviour.

p-value was evaluated through ANOVA or Kruskal-Wallis test.

----- From post-hoc analysis did not emerge any statistically significant difference

---

**Table 3S**  
**Personality assessment with MCMI-III at baseline by groups**

| <b>MCMI-III</b>     | <b>V</b><br><b>N=73</b><br><b>n (%)</b> | <b>V-SH</b><br><b>N=53</b><br><b>n (%)</b> | <b>SH</b><br><b>N=34</b><br><b>n (%)</b> | <b>CONT</b><br><b>N=86</b><br><b>n (%)</b> | <i>p-value</i> |
|---------------------|-----------------------------------------|--------------------------------------------|------------------------------------------|--------------------------------------------|----------------|
| <b>Schizoid</b>     |                                         |                                            |                                          |                                            |                |
| No                  | 44 (62.9)                               | 33 (66.0)                                  | 23 (69.7)                                | 52 (62.7)                                  | 0.898          |
| Maladaptive trait   | 8 (11.4)                                | 4 (8.0)                                    | 2 (6.1)                                  | 5 (6.0)                                    |                |
| Disorder            | 18 (25.7)                               | 13 (26.0)                                  | 8 (24.2)                                 | 26 (31.3)                                  |                |
| <b>Avoidant</b>     |                                         |                                            |                                          |                                            |                |
| No                  | 39 (55.7)                               | 27 (54.0)                                  | 17 (51.5)                                | 40 (48.2)                                  | 0.548          |
| Maladaptive trait   | 13 (18.6)                               | 5 (10.0)                                   | 8 (24.2)                                 | 14 (16.9)                                  |                |
| Disorder            | 18 (25.7)                               | 18 (36.0)                                  | 8 (24.2)                                 | 29 (34.9)                                  |                |
| <b>Depressive</b>   |                                         |                                            |                                          |                                            |                |
| No                  | 41 (58.6)                               | 26 (52.0)                                  | 18 (54.6)                                | 50 (60.2)                                  | 0.818          |
| Maladaptive trait   | 11 (15.7)                               | 5 (10.0)                                   | 4 (12.1)                                 | 10 (12.0)                                  |                |
| Disorder            | 18 (25.7)                               | 19 (38.0)                                  | 11 (33.3)                                | 23 (27.7)                                  |                |
| <b>Dependent</b>    |                                         |                                            |                                          |                                            |                |
| No                  | 36 (51.4)                               | 28 (56.0)                                  | 21 (63.6)                                | 145 (54.2)                                 | 0.341          |
| Maladaptive trait   | 13 (18.6)                               | 8 (16.0)                                   | 3 (9.1)                                  | 6 (7.2)                                    |                |
| Disorder            | 21 (30.0)                               | 14 (28.0)                                  | 9 (27.3)                                 | 32 (38.6)                                  |                |
| <b>Histrionic</b>   |                                         |                                            |                                          |                                            |                |
| No                  | 49 (70.0)                               | 31 (62.0)                                  | 23 (69.7)                                | 52 (62.7)                                  | 0.857          |
| Maladaptive trait   | 8 (11.4)                                | 7 (14.0)                                   | 3 (9.1)                                  | 8 (9.6)                                    |                |
| Disorder            | 13 (18.6)                               | 12 (24.0)                                  | 7 (21.2)                                 | 23 (27.7)                                  |                |
| <b>Narcissistic</b> |                                         |                                            |                                          |                                            |                |
| No                  | 41 (58.6)                               | 31 (62.0)                                  | 28 (84.8)                                | 54 (65.1)                                  | 0.268          |
| Maladaptive trait   | 10 (14.3)                               | 6 (12.0)                                   | 1 (3.0)                                  | 8 (9.6)                                    |                |
| Disorder            | 19 (27.1)                               | 13 (26.0)                                  | 4 (12.1)                                 | 21 (25.3)                                  |                |
| <b>Antisocial</b>   |                                         |                                            |                                          |                                            |                |
| No                  | 53 (75.7)                               | 36 (72.0)                                  | 27 (81.8)                                | 61 (73.5)                                  | 0.937          |
| Maladaptive trait   | 2 (2.9)                                 | 2 (4.0)                                    | 1 (3.0)                                  | 5 (6.0)                                    |                |
| Disorder            | 15 (21.4)                               | 12 (24.0)                                  | 5 (15.2)                                 | 17 (20.5)                                  |                |
| <b>Sadistic</b>     |                                         |                                            |                                          |                                            |                |
| No                  | 59 (84.3)                               | 38 (76.0)                                  | 27 (81.8)                                | 65 (78.3)                                  | °              |
| Maladaptive trait   | 0 (0.0)                                 | 0 (0.0)                                    | 0 (0.0)                                  | 0 (0.0)                                    |                |
| Disorder            | 11 (15.7)                               | 12 (24.0)                                  | 6 (18.2)                                 | 18 (21.7)                                  |                |
| <b>Compulsive</b>   |                                         |                                            |                                          |                                            |                |
| No                  | 34 (48.6)                               | 25 (50.0)                                  | 19 (57.6)                                | 30 (36.1)                                  | 0.319          |
| Maladaptive trait   | 4 (5.7)                                 | 1 (2.0)                                    | 1 (3.0)                                  | 7 (8.4)                                    |                |
| Disorder            | 32 (45.7)                               | 24 (48.0)                                  | 13 (39.4)                                | 46 (55.4)                                  |                |
| <b>Negativistic</b> |                                         |                                            |                                          |                                            |                |
| No                  | 36 (51.4)                               | 21 (42.0)                                  | 23 (69.7)                                | 47 (56.6)                                  | 0.313          |
| Maladaptive trait   | 13 (18.6)                               | 12 (24.0)                                  | 4 (12.1)                                 | 12 (14.5)                                  |                |
| Disorder            | 21 (30.0)                               | 17 (34.0)                                  | 6 (18.2)                                 | 24 (28.9)                                  |                |
| <b>Masochistic</b>  |                                         |                                            |                                          |                                            |                |
| No                  | 57 (81.4)                               | 40 (80.0)                                  | 26 (78.8)                                | 64 (77.1)                                  | °              |
| Maladaptive trait   | 0 (0.0)                                 | 0 (0.0)                                    | 0 (0.0)                                  | 0 (0.0)                                    |                |
| Disorder            | 13 (18.6)                               | 10 (20.0)                                  | 7 (21.2)                                 | 19 (22.9)                                  |                |

|                    |           |           |           |           |       |
|--------------------|-----------|-----------|-----------|-----------|-------|
| <b>Schizotypal</b> |           |           |           |           |       |
| No                 | 53 (75.7) | 33 (66.0) | 23 (69.7) | 59 (71.1) | 0.773 |
| Maladaptive trait  | 2 (2.9)   | 4 (8.0)   | 3 (9.1)   | 4 (4.8)   |       |
| Disorder           | 15 (21.4) | 13 (26.0) | 7 (21.2)  | 20 (24.1) |       |
| <b>Borderline</b>  |           |           |           |           |       |
| No                 | 40 (57.1) | 19 (38.0) | 19 (57.6) | 50 (60.2) | 0.066 |
| Maladaptive trait  | 9 (12.9)  | 4 (8.0)   | 5 (15.2)  | 11 (13.3) |       |
| Disorder           | 21 (30.0) | 27 (54.0) | 9 (27.3)  | 22 (26.5) |       |
| <b>Paranoid</b>    |           |           |           |           |       |
| No                 | 46 (65.7) | 29 (58.0) | 25 (75.8) | 58 (69.9) | 0.274 |
| Maladaptive trait  | 4 (5.7)   | 0 (0.0)   | 1 (3.0)   | 3 (3.6)   |       |
| Disorder           | 20 (28.6) | 21 (42.0) | 7 (21.2)  | 22 (26.5) |       |

V: patients with a history of violent behaviour against other people (but not self-harm behaviour); V-SH: patients with both a history of violent behaviour against other people and self-harm behaviour; SH: patients with a history of self-harm behaviour; CONT: patients with no history of violent behaviour against other people and of self-harm behaviour.

p-value was obtained through  $\chi^2$  test or Fisher's exact test (when  $n < 5$  at least in one cell).

° The p-value could not be estimated.

**Table 4S**  
**Predictors of aggressive and violent behavior: generalized linear models (GLMs)**  
**with interaction effect between variables and groups (all sample), and**  
**corresponding GLMs for the four groups**

| Dependent: MOAS Total score                            |                                   |                                              |                                            |                                               |                                              |
|--------------------------------------------------------|-----------------------------------|----------------------------------------------|--------------------------------------------|-----------------------------------------------|----------------------------------------------|
| Independent variables                                  | All sample<br>pvalue <sup>o</sup> | Groups                                       |                                            |                                               |                                              |
|                                                        |                                   | V<br>$\beta_V$                               | V-SH<br>$\beta_{V-SH}$                     | SH<br>$\beta_{SH}$                            | CONT<br>$\beta_{CONT}$                       |
| <b>MCMI Negativistic</b><br>(2=Dis; 1=Trait; 0=No-ref) | <0.001                            | 2 vs 0 2.10<br>1 vs 0 1.00                   | 2 vs 0 1.56<br>1 vs 0 0.51                 | <b>2 vs 0 2.62*</b><br><b>1 vs 0 8.38*</b>    | <b>2 vs 0 1.83**</b><br><b>1 vs 0 5.20**</b> |
| <b>BIS Total Score</b>                                 | <0.001                            | 1.01                                         | 1.02                                       | <b>1.08**</b>                                 | <b>0.95**</b>                                |
| <b>Lifetime Substances use</b><br>(Yes vs No-ref)      | <0.001                            | 1.09                                         | 1.08                                       | <b>4.44**</b>                                 | <b>5.98**</b>                                |
| <b>BIS Motor Impulsiveness</b>                         | 0.001                             | 1.01                                         | <b>1.08*</b>                               | <b>1.22**</b>                                 | <b>0.91*</b>                                 |
| <b>Interpersonal relationships</b><br>(Yes vs No-ref)  | 0.001                             | 0.42*                                        | 1.77                                       | 0.40                                          | <b>8.18**</b>                                |
| <b>SLOF Social acceptability</b>                       | 0,001                             | 0.94                                         | <b>0.90**</b>                              | <b>0.80*</b>                                  | <b>0.73**</b>                                |
| <b>MCMI Borderline</b><br>(2=Dis; 1=Trait; 0=No-ref)   | 0.002                             | 2 vs 0 2.29*<br>1 vs 0 1.01*                 | 2 vs 0 1.43<br>1 vs 0 1.70                 | <b>2 vs 0 4.63**</b><br><b>1 vs 0 12.07**</b> | 2 vs 0 0.40<br>1 vs 0 1.21                   |
| <b>BIS Non Planning Impulsiveness</b>                  | 0,002                             | 0.99                                         | 1.02                                       | <b>1.10*</b>                                  | <b>0.90**</b>                                |
| <b>BGLHA</b>                                           | 0.002                             | 1.04*                                        | 0.99                                       | <b>1.13**</b>                                 | 1.01                                         |
| <b>Time spent doing nothing (&lt;3 vs &gt;3-ref)</b>   | 0.003                             | 0.41**                                       | 0.69                                       | 0.70                                          | <b>2.50**</b>                                |
| <b>MCMI Schizotypal</b><br>(2=Dis; 1=Trait; 0=No-ref)  | 0.008                             | 2 vs 0 1.50*<br>1 vs 0 0.20*                 | <b>2 vs 0 2.27*</b><br><b>1 vs 0 3.07*</b> | 2 vs 0 1.00<br>1 vs 0 0.09                    | 2 vs 0 0.79<br>1 vs 0 0.18                   |
| <b>BPRS Activation</b>                                 | 0.008                             | 1.05                                         | <b>1.06*</b>                               | <b>1.26**</b>                                 | <b>1.20**</b>                                |
| <b>MCMI Istrionica</b><br>(2=Dis; 1=Trait; 0=No-ref)   | 0.014                             | <b>2 vs 0 2.10**</b><br><b>1 vs 0 0.99**</b> | 2 vs 0 1.95<br>1 vs 0 1.26                 | 2 vs 0 0.96<br>1 vs 0 0.41                    | 2 vs 0 0.51<br>1 vs 0 1.40                   |
| <b>STAXI Index</b>                                     | 0.022                             | 1.01                                         | <b>1.04**</b>                              | <b>1.07**</b>                                 | 1.02                                         |
| <b>BIS Attentional Impulsiveness</b>                   | 0.035                             | 1.05                                         | 1.02                                       | <b>1.16*</b>                                  | 0.94                                         |
| <b>BDHI Indirect aggression</b>                        | 0.050                             | 0.93                                         | 1.07                                       | <b>1.61*</b>                                  | 0.94                                         |
| Dependent: MOAS Verbal Aggression                      |                                   |                                              |                                            |                                               |                                              |
| <b>BIS Motor Impulsiveness</b>                         | 0.001                             | 1.02                                         | 1.07                                       | <b>1.25**</b>                                 | 0.94                                         |
| <b>Interpersonal relationships</b><br>(Yes vs No-ref)  | 0.002                             | <b>0.38**</b>                                | 1.54                                       | 0.53                                          | <b>5.14**</b>                                |
| <b>BIS Total Score</b>                                 | 0.002                             | 1.01                                         | 1.03                                       | <b>1.07**</b>                                 | <b>0.97*</b>                                 |
| <b>Lifetime Substances use (Si vs No-ref)</b>          | 0.004                             | 1.24                                         | 0.96                                       | <b>3.62*</b>                                  | <b>4.49**</b>                                |
| <b>BPRS Total Score</b>                                | 0.015                             | 1.00                                         | <b>1.04**</b>                              | 1.04                                          | <b>1.06**</b>                                |
| <b>MCMI Negativistic</b><br>(2=Dis; 1=Trait; 0=No-ref) | 0.016                             | 2 vs 0 2.11<br>1 vs 0 1.36                   | 2 vs 0 1.53<br>1 vs 0 0.66                 | <b>2 vs 0 3.38*</b><br><b>1 vs 0 6.36*</b>    | <b>2 vs 0 1.27**</b><br><b>1 vs 0 3.74**</b> |
| <b>SLOF Social acceptability</b>                       | 0.018                             | <b>0.91*</b>                                 | <b>0.89**</b>                              | <b>0.83*</b>                                  | <b>0.75**</b>                                |
| <b>STAXI Index</b>                                     | 0.022                             | 1.01                                         | <b>1.04**</b>                              | <b>1.07**</b>                                 | 1.02                                         |
| <b>BGLHA</b>                                           | 0.024                             | 1.02                                         | 0.99                                       | <b>1.11*</b>                                  | 1.00                                         |
| <b>MCMI Borderline</b><br>(2=Dis; 1=Trait; 0=No-ref)   | 0.036                             | <b>2 vs 0 2.45*</b><br><b>1 vs 0 1.77*</b>   | 2 vs 0 1.32<br>1 vs 0 1.76                 | <b>2 vs 0 4.19*</b><br><b>1 vs 0 6.53*</b>    | 2 vs 0 0.53<br>1 vs 0 1.32                   |
| <b>BIS Non Planning Impulsiveness</b>                  | 0.045                             | 1.01                                         | 1.05                                       | 1.06                                          | <b>0.94*</b>                                 |
| Dependent: MOAS Aggression against Objects             |                                   |                                              |                                            |                                               |                                              |

|                                                      |       |                                            |                            |                            |                                             |
|------------------------------------------------------|-------|--------------------------------------------|----------------------------|----------------------------|---------------------------------------------|
| <b>BIS Total Score</b>                               | 0.004 | 1.02                                       | 1.01                       | <b>1.12**</b>              | 0.93                                        |
| <b>Time spent doing nothing (&lt;3 vs &gt;3-ref)</b> | 0.007 | 0.44                                       | 0.83                       | 0.72                       | <b>16.06*</b>                               |
| <b>BIS Motor Impulsiveness</b>                       | 0.009 | 1.03                                       | 1.04                       | <b>1.33**</b>              | 0.80                                        |
| <b>Lifetime Substances use (Yes vs No-ref)</b>       | 0.010 | 0.50                                       | 0.96                       | <b>5.62*</b>               | <b>6.96*</b>                                |
| <b>BIS Non Planning Impulsiveness</b>                | 0.022 | 1.01                                       | 0.99                       | 1.11                       | <b>0.84*</b>                                |
| <b>MCMI Negativistic (2=Dis; 1=Trait; 0=No-ref)</b>  | 0.031 | <b>2 vs 0 4.00*</b><br><b>1 vs 0 1.66*</b> | 2 vs 0 0.93<br>1 vs 0 0.40 | 2 vs 0 4.89<br>1 vs 0 6.11 | <b>2 vs 0 3.50*</b><br><b>1 vs 0 14.96*</b> |

V: patients with a history of violent behaviour against other people (but not self-harm behaviour); V-SH: patients with both a history of violent behaviour against other people and self-harm behaviour; SH: patients with a history of self-harm behaviour; CONT: patients with no history of violent behaviour against other people and of self-harm behaviour.

ref indicates the baseline category

p value: significance of the interaction term between the group variable and the independent variables

\* p<0.05; \*\*p<0.01

$\beta$ : exponential transformation of the coefficients of the Generalized Linear Models.

$\beta_V, \beta_{V-SH}, \beta_{SH}, \beta_{CONT}$ : estimates of the variable effect in the four groups separately
